# Supplementary material
Source: PubMed Central journal article supplement (PMC3502618)
Supplement: supp_mol.112.079699_Suppl.Fig1NKGy1.pdf [file supp_mol.112.079699_Suppl.Fig1NKGy1.pdf]

# Virtual Screening for LPA2-Specific Agonists Identifies a Nonlipid Compound with Antiapoptotic Actions

Gyöngyi N. Kiss, James I. Fells, Renuka Gupte, Sue-Chin Lee, Jianxiong Liu, Nóra Nusser, Keng G. Lim, Ramesh M. Ray, Fang-Tsyr Lin, Abby L. Parrill, Balázs Sümegei, Duane D. Miller, Gabor Tigyi  
Molecular Pharmacology

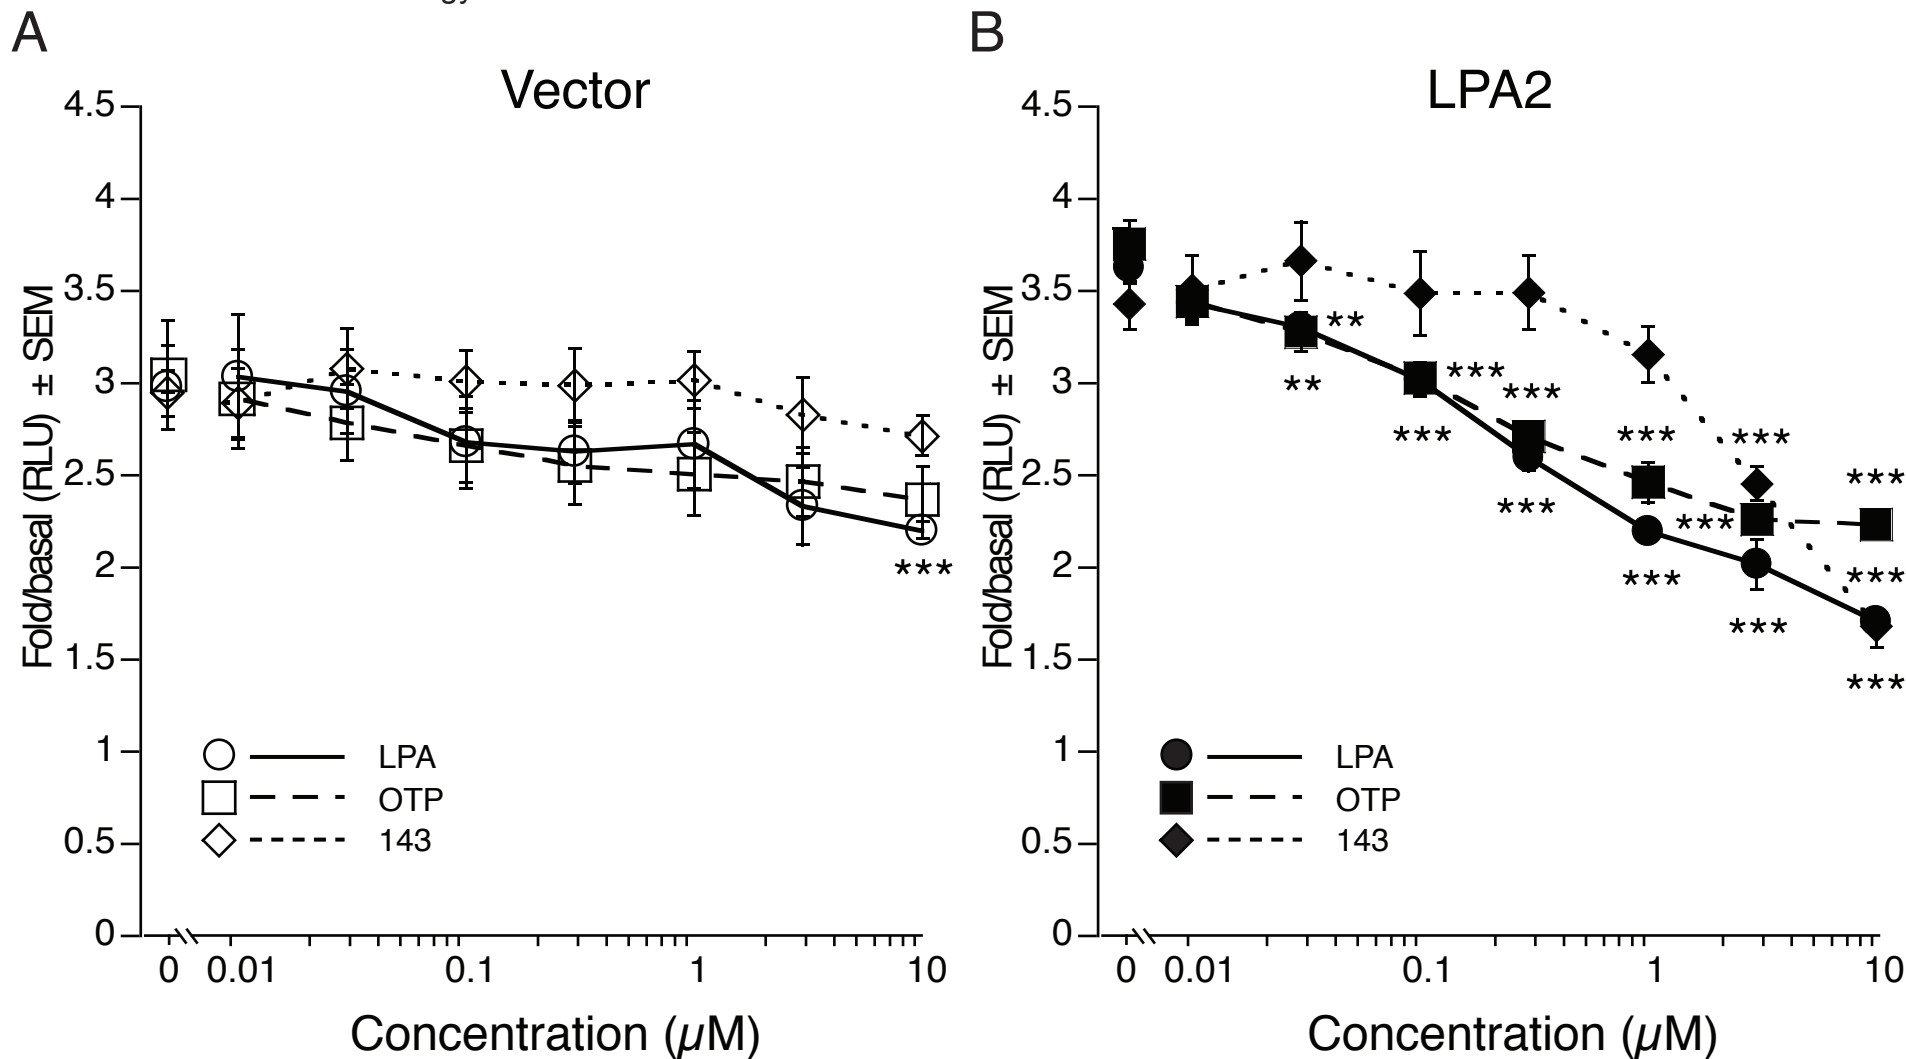

Supplemental figure 1: Effect of LPA (circles), OTP (squares), and GRI977143 (diamonds) on Adriamycin-induced caspase 3 and 7 activation in vector- (panel A) or LPA2-transduced (panel B) MEF cells. Data points represent the mean of triplicate wells and the data are representative of three independent experiments. (\* $p \leq 0.05$ , \*\* $p \leq 0.01$ , \*\*\* $p \leq 0.001$ ).
